# Supplementary material for: Cytosolic Ca2+ gradients and mitochondrial Ca2+ uptake in resting muscle fibers: A model analysis
Source: PubMed Central journal article supplement — Biophys Rep (N Y). 2023 Jul 17;3(3):100117. doi: 10.1016/j.bpr.2023.100117 (PMC10412765; doi:10.1016/j.bpr.2023.100117), 2023-07-17
Supplement: mmc1.pdf [file mmc1.pdf]

**Biophysical Reports, Volume 3**

**Supplemental information**

**Cytosolic  $\text{Ca}^{2+}$  gradients and mitochondrial  $\text{Ca}^{2+}$  uptake in resting muscle fibers: A model analysis**

**Lorenzo Marcucci, Antonio Michelucci, and Carlo Reggiani**

## Supplementary text

Numerical data was obtained using an improved version of our model for calcium diffusion in skeletal muscle (1). The diffusion-reaction model of a cylindrical half sarcomere is divided in a mesh with 50 longitudinal and 20 radial compartments with an assumed total length  $L=1.25 \mu\text{m}$  and radius  $R=0.5 \mu\text{m}$ . Calcium diffusion coefficient is taken to be  $D=300 \mu\text{m}^2/\text{s}$  (2). Indexing the radial compartments with the variable  $i$  and the longitudinal ones with the variable  $j$  the equation for the radial and longitudinal diffusion between compartments becomes (3, Chap. 8):

$$\frac{\partial[\text{Ca}^{2+}]_{i,j}}{\partial t} = 4D(n/R)^2[[\text{Ca}^{2+}]_{1,j} - [\text{Ca}^{2+}]_{0,j}] + D\left(\frac{m}{L}\right)^2 [[\text{Ca}^{2+}]_{i,j+1} - 2[\text{Ca}^{2+}]_{i,j} + [\text{Ca}^{2+}]_{i,j-1}] + F([\text{Ca}^{2+}]_{i,j}, t)$$

For the  $m$  inner radial compartments ( $i = 0$ ) and:

$$\frac{\partial[\text{Ca}^{2+}]_{i,j}}{\partial t} = \frac{D(n/R)^2}{2i} [(2i + 1)[\text{Ca}^{2+}]_{i+1,j} - 4i[\text{Ca}^{2+}]_{i,j} + (2i - 1)[\text{Ca}^{2+}]_{i-1,j}] + D(m/L)^2 [[\text{Ca}^{2+}]_{i,j+1} - 2[\text{Ca}^{2+}]_{i,j} + [\text{Ca}^{2+}]_{i,j-1}] + F([\text{Ca}^{2+}]_{i,j}, t)$$

for all other compartments ( $i \neq 0$ ) up to  $i = n - 1$ . The radial index for the compartments representative of the sarcoplasmic reticulum being  $n$ .

$F([\text{Ca}^{2+}]_{i,j}, t)$  represents the sources and/or sinks factor for parvalbumin (PV), troponin C (TnC), calsequestrin (CASQ), mitochondrial buffers and extracellular buffers as well as the fluxes. All numerical values of the parameters are reported in the supplementary material Table 1. Buffers are modeled as

$$\frac{d[\text{SCa}^{2+}]}{dt} = k_{on}[\text{Ca}^{2+}]^n[S] - k_{off}[\text{SCa}^{2+}]$$

Where  $[S]$  is the free buffer concentration,  $[\text{SCa}^{2+}]$  the bound buffer concentration, with  $[S^{Tot}] = [S] + [\text{SCa}^{2+}]$  and  $n$  simulates the cooperativity, equal to 1 if not present.

TnC, with two calcium binding sites ( $Tr_1$  and  $Tr_2$ ) with different affinities, is described by:

$$\frac{d[Tr_1Ca^{2+}]}{dt} = k_{Tr1on}[Ca^{2+}]^{n1}[Tr] - k_{Tr1off}[Tr_1Ca^{2+}] - k_{Tr2on}[Ca^{2+}]^{n2}[Tr_1Ca^{2+}] + k_{Tr2off}[Tr_2Ca^{2+}]$$

and:

$$\frac{d[Tr_2Ca^{2+}]}{dt} = k_{Tr2on}[Ca^{2+}]^{n2}[Tr_1Ca^{2+}] - k_{Tr2off}[Tr_2Ca^{2+}]$$

With the constraint  $[Tr^{Tot}] = [Tr] + [Tr_1Ca^{2+}] + [Tr_2Ca^{2+}]$ .

The other components of  $F([Ca^{2+}]_{l,j}, t)$  are calcium fluxes from and to the elements and compartments, through channels and pumps.

RyR channel has a constant leak computed as described in the text.

The reuptake of calcium in the SR is operated by the SERCA, here simulated in a saturable first-order kinetics (4):

$$\left. \frac{dCa^{2+}}{dt} \right|_{Up} = V_{max} \frac{[Ca^{2+}]_x}{[Ca^{2+}]_x + K_m}$$

active in each compartment x which is in the  $i=n-1$  radial position. A similar kinetics is imposed to the MCU flux or  $v_{MCU}$

$$v_{MCU} = \left. \frac{dCa^{2+}}{dt} \right|_{MCU} = V_{MCU} \frac{[Ca^{2+}]_c^h}{[Ca^{2+}]_c^h + K_d^h}$$

Notably, the  $[Ca^{2+}]_{cyto}$  sensed by the MCU is in the element  $i=n-2, j=m_{RyR}-2$ , being  $m_{RyR}$  the longitudinal index of the compartment which contains the RyR, roughly equating to the average distances inferred from the structural data (see text). The efflux of calcium from the mitochondria via the Sodium-Calcium-Lithium Exchanger (NCLX) follows the model proposed by Dash and Beard (5) with a 3:1 stoichiometry for  $Na^+$  and  $Ca^{2+}$

$$\left. \frac{dCa^{2+}}{dt} \right|_{NCLX} = V_{NCLX} \left( \frac{e^{+\frac{0.5\Delta\Psi_m F}{RT}} \frac{[Na^+]_c^3 [Ca^{2+}]_m}{K_{Na}^3 K_{Ca}} - e^{-\frac{0.5\Delta\Psi_m F}{RT}} \frac{[Na^+]_m^3 [Ca^{2+}]_c}{K_{Na}^3 K_{Ca}}}{1 + \frac{[Na^+]_c^3}{K_{Na}^3} + \frac{[Ca^{2+}]_m}{K_{Ca}} + \frac{[Na^+]_c^3 [Ca^{2+}]_m}{K_{Na}^3 K_{Ca}} + \frac{[Na^+]_m^3}{K_{Na}^3} + \frac{[Ca^{2+}]_c}{K_{Ca}} + \frac{[Na^+]_m^3 [Ca^{2+}]_c}{K_{Na}^3 K_{Ca}}} \right)$$

In our simplified approach, the values of  $[Na^+]_c$ ,  $[Na^+]_m$ , and  $\Delta\Psi_m$ , are assumed to be constant during the train of stimuli. A similar equation is used to simulate the Sodium-Calcium Exchanger (NCX) flux, as proposed in (6). MCU and NCLX have a constant flux of  $Ca^{2+}$  even in resting conditions. This would also create a local modification of the  $Ca^{2+}$  concentration, though smaller than the one generated by the RyR leakage. However, the size of the compartments is not small enough to appreciate this effect. Since the mitochondria occupy only one compartment, the two fluxes are simply balancing each other.

The influx from the extracellular compartment, operated by the SOCE, is meant to equilibrate the  $[Ca^{2+}]_{SR}$  content to keep it at the quiescent level of 500  $\mu M$  (7)

**Supplementary Table 1: Parameters definitions, values adapted at 25°C, and reference (concentration values are express with reference to 1 Liter fiber volume,  $L_{\text{fiber}}$ )**

| Parameter                      | Meaning                                       | Value                              |
|--------------------------------|-----------------------------------------------|------------------------------------|
| L                              | length of half-sarcomere                      | 1.25 $\mu\text{m}$                 |
| R                              | Radius of sarcomere                           | 0.5 $\mu\text{m}$                  |
| $V_{\text{TC}}$                | volume of Terminal Cisternae                  | 3.5% $V_{\text{tot}}$              |
| $V_{\text{SR}}$                | volume of Sarcoplasmic Reticulum              | 5.5% $V_{\text{tot}}$              |
| $V_{\text{mito}}$              | Volume of mitochondrion                       | 4.2%-5.6% $V_{\text{tot}}$         |
| $V_{\text{t-sys}}$             | Volume of T-tubule system                     | 1% $V_{\text{tot}}$                |
| D                              | free diffusion coefficient                    | 300 $\mu\text{m}^2 \text{s}^{-1}$  |
| CSQ1                           | Calsequestrin 1 concentration                 | 1200 $\mu\text{M}$                 |
| CSQ2                           | Calsequestrin 2 concentration                 | 120 $\mu\text{M}$                  |
| $k_{\text{ON}}^{\text{CS1}}$   | Calsequestrin 1 binding rate                  | 3 $10^{-3} \mu\text{M s}^{-1}$     |
| $k_{\text{OFF}}^{\text{CS1}}$  | Calsequestrin 1 unbinding rate                | 3 $\text{s}^{-1}$                  |
| $n^{\text{CS1}}$               | Calsequestrin 1 cooperativity                 | 3                                  |
| $k_{\text{ON}}^{\text{CS2}}$   | Calsequestrin 2 binding rate                  | 15 $10^{-4} \mu\text{M s}^{-1}$    |
| $k_{\text{OFF}}^{\text{CS2}}$  | Calsequestrin 2 unbinding rate                | 15 $10^{-4} \mu\text{M s}^{-1}$    |
| $n^{\text{CS2}}$               | Calsequestrin 2 cooperativity                 | 1                                  |
| PV                             | Parvalbumin concentration                     | 1500 $\mu\text{M}$                 |
| $k_{\text{ON}}^{\text{PaCa}}$  | PV-Ca binding rate                            | 77.8 $\mu\text{M s}^{-1}$          |
| $k_{\text{OFF}}^{\text{PaCa}}$ | PV-Ca unbinding rate                          | 1.7 $\text{s}^{-1}$                |
| Tr                             | Troponin concentration                        | 240 $\mu\text{M}$                  |
| $k_{\text{ON}}^{\text{Tr1}}$   | Troponin 1 binding rate                       | 707 $\mu\text{M s}^{-1}$           |
| $k_{\text{OFF}}^{\text{Tr1}}$  | Troponin 1 unbinding rate                     | 2885 $\text{s}^{-1}$               |
| $k_{\text{ON}}^{\text{Tr2}}$   | Troponin 2 binding rate                       | 162.6 $10^{-4} \mu\text{M s}^{-1}$ |
| $k_{\text{OFF}}^{\text{Tr2}}$  | Troponin 2 unbinding rate                     | 31.1 $\text{s}^{-1}$               |
| $B_{\text{tsys}}$              | T-system buffer                               | 400 $\mu\text{M}$                  |
| T                              | Absolute temperature                          | 300 K                              |
| $X_{\text{NCE}}$               | NCLX factor                                   | see text                           |
| $\Delta\Psi$                   | Mitochondrial inner membrane potential        | 190 mV                             |
| $K_{\text{Ca}}^{\text{NCE}}$   | $\text{Ca}^{2+}$ binding constant of NCLX     | 2.1 $\mu\text{M}$                  |
| $K_{\text{Na}}^{\text{NCE}}$   | $\text{Na}^{+}$ binding constant of NCLX      | 8200 $\mu\text{M}$                 |
| $V_{\text{MCU}}$               | MCU maximum flux rate                         | 22.4 $\mu\text{M s}^{-1}$          |
| h                              | Hill parameter for MCU                        | 2                                  |
| $K_{\text{d}}$                 | MCU binding constant for $[\text{Ca}^{2+}]$   | 20 $\mu\text{M}$                   |
| $V_{\text{max}}$               | maximum pump rate for SERCA                   | 5.6 $\cdot 10^3 \mu\text{M}$       |
| $K_{\text{m}}$                 | SERCA binding constant for $[\text{Ca}^{2+}]$ | 0.5 $\mu\text{M}$                  |

## References:

1. Marcucci, L., M. Canato, F. Protasi, G.J.M. Stienen, and C. Reggiani. 2018. A 3D diffusional-compartmental model of the calcium dynamics in cytosol, sarcoplasmic reticulum and mitochondria of murine skeletal muscle fibers. *PLOS ONE*. 13:e0201050.
2. Cannell, M.B., and D.G. Allen. 1984. Model of calcium movements during activation in the sarcomere of frog skeletal muscle. *Biophysical Journal*. 45:913–925.
3. Crank, J. 1979. *The Mathematics of Diffusion*. Clarendon Press.
4. Westerblad, H., and D.G. Allen. 1994. The role of sarcoplasmic reticulum in relaxation of mouse muscle; effects of 2, 5-di (tert-butyl)-1, 4-benzohydroquinone. *The Journal of Physiology*. 474:291.
5. Dash, R.K., and D.A. Beard. 2008. Analysis of cardiac mitochondrial Na<sup>+</sup>-Ca<sup>2+</sup> exchanger kinetics with a biophysical model of mitochondrial Ca<sup>2+</sup> handling suggests a 3: 1 stoichiometry: Characterization of mitochondrial NCE stoichiometry. *The Journal of Physiology*. 586:3267–3285.
6. Rincón, O.A., A.F. Milán, J.C. Calderón, and M.A. Giraldo. 2021. Comprehensive Simulation of Ca<sup>2+</sup> Transients in the Continuum of Mouse Skeletal Muscle Fiber Types. *International Journal of Molecular Sciences*. 22:12378.
7. Scorzeto, M., M. Giacomello, L. Toniolo, M. Canato, B. Blaauw, C. Paolini, F. Protasi, C. Reggiani, and G.J.M. Stienen. 2013. Mitochondrial Ca<sup>2+</sup>-Handling in Fast Skeletal Muscle Fibers from Wild Type and Calsequestrin-Null Mice. *PLoS ONE*. 8:e74919.
