# Supplementary material for: Cytosolic Ca2+ gradients and mitochondrial Ca2+ uptake in resting muscle fibers: A model analysis
Source: PubMed Central journal article supplement — Biophys Rep (N Y). 2023 Jul 17;3(3):100117. doi: 10.1016/j.bpr.2023.100117 (PMC10412765; doi:10.1016/j.bpr.2023.100117), 2023-07-17
Supplement: mmc3.pdf [file mmc3.pdf]

# Cytosolic $\text{Ca}^{2+}$ gradients and mitochondrial $\text{Ca}^{2+}$ uptake in resting muscle fibers: A model analysis

Lorenzo Marcucci,<sup>1,2,\*</sup> Antonio Michelucci,<sup>3</sup> and Carlo Reggiani<sup>1,4</sup>

<sup>1</sup>Department of Biomedical Sciences, University of Padova, Padova, Italy; <sup>2</sup>Center for Biosystems Dynamics Research, RIKEN, Suita, Japan; <sup>3</sup>Department of Chemistry, Biology, and Biotechnology, University of Perugia, Perugia, Italy; and <sup>4</sup>Science and Research Center Koper, Institute for Kinesiology Research, Koper, Slovenia

**ABSTRACT** Calcium ions ( $\text{Ca}^{2+}$ ) enter mitochondria via the mitochondrial  $\text{Ca}^{2+}$  uniporter, driven by electrical and concentration gradients. In this regard, transgenic mouse models, such as calsequestrin knockout (CSQ-KO) mice, with higher mitochondrial  $\text{Ca}^{2+}$  concentrations ( $[\text{Ca}^{2+}]_{\text{mito}}$ ), should display higher cytosolic  $\text{Ca}^{2+}$  concentrations ( $[\text{Ca}^{2+}]_{\text{cyto}}$ ). However, repeated measurements of  $[\text{Ca}^{2+}]_{\text{cyto}}$  in quiescent CSQ-KO fibers never showed a difference between WT and CSQ-KO. Starting from the consideration that fluorescent  $\text{Ca}^{2+}$  probes (Fura-2 and Indo-1) measure averaged global cytosolic concentrations, in this report we explored the role of local  $\text{Ca}^{2+}$  concentrations (i.e.,  $\text{Ca}^{2+}$  microdomains) in regulating mitochondrial  $\text{Ca}^{2+}$  in resting cells, using a multicompartamental diffusional  $\text{Ca}^{2+}$  model. Progressively including the inward and outward fluxes of sarcoplasmic reticulum (SR), extracellular space, and mitochondria, we explored their contribution to the local  $\text{Ca}^{2+}$  distribution within the cell. The model predicts  $\text{Ca}^{2+}$  concentration gradients with hot spots or microdomains even at rest, minor but similar to those of evoked  $\text{Ca}^{2+}$  release. Due to their specific localization close to  $\text{Ca}^{2+}$  release units (CRU), mitochondria could take up  $\text{Ca}^{2+}$  directly from high-concentration microdomains, thus sensibly raising  $[\text{Ca}^{2+}]_{\text{mito}}$ , despite minor, possibly undetectable, modifications of the average  $[\text{Ca}^{2+}]_{\text{cyto}}$ .

**WHY IT MATTERS** In skeletal muscle,  $\text{Ca}^{2+}$  enters the inner mitochondrial membrane via the mitochondrial  $\text{Ca}^{2+}$  uniporter (MCU) to regulate metabolic activation and apoptosis. Due to the proximity of the MCU to the ryanodine receptor type-1 (RyR1), which releases  $\text{Ca}^{2+}$  in the myoplasm during stimulation, mitochondria take advantage of a locally high  $[\text{Ca}^{2+}]$  named microdomains. Here, we show, by means of a numerical model, that these microdomains are present also in resting fibers, induced by RyR1 leakage. These “resting microdomains” become even more relevant in the calsequestrin knockout (CSQ-KO) mouse model where the RyR1 leakage is enhanced. These resting microdomains can explain the observed mitochondrial  $[\text{Ca}^{2+}]$  at rest in CSQ-KO fibers, with a minimum, possibly undetectable, variation in the average cytosolic  $[\text{Ca}^{2+}]$ .

## INTRODUCTION

In skeletal muscle fibers, the sarcoplasmic reticulum (SR) is both the largest intracellular  $\text{Ca}^{2+}$  store and the only compartment able to quickly release and reuptake  $\text{Ca}^{2+}$ . In this way, SR links the sarcolemma electrical activity to myofibrillar force generation. The relevance of mitochondrial  $\text{Ca}^{2+}$  uptake to regulate ATP synthesis is widely accepted, but their ability to store  $\text{Ca}^{2+}$  has been debated for many years.

Recently, the determination of mitochondrial  $\text{Ca}^{2+}$  content, using the membrane lysis method (1), has definitely confirmed that, in skeletal muscle, mitochondria are endowed with a high  $\text{Ca}^{2+}$ -buffering capacity.

Interestingly, the lysis method showed that total mitochondrial calcium content is increased in two transgenic mouse models with a  $\text{Ca}^{2+}$  leak through SR ryanodine receptor type-1 (RyR1)  $\text{Ca}^{2+}$  channel: a gain of function RyR1 knockin and the calsequestrin knockout (CSQ-KO) mice (1). In RYR1 models, a direct comparison between total mitochondrial calcium and free mitochondrial  $\text{Ca}^{2+}$  ( $[\text{Ca}^{2+}]_{\text{mito}}$ ) showed the high buffering power of the organelle, while a comparison

Submitted May 3, 2023, and accepted for publication July 12, 2023.

\*Correspondence: [lorenzo.marcucci@unipd.it](mailto:lorenzo.marcucci@unipd.it)

Editor: Howard Young.

<https://doi.org/10.1016/j.bpr.2023.100117>

© 2023 The Author(s).

This is an open access article under the CC BY-NC-ND license (<http://creativecommons.org/licenses/by-nc-nd/4.0/>).

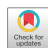

with previously published data on free cytosolic  $\text{Ca}^{2+}$  ( $[\text{Ca}^{2+}]_{\text{cyto}}$ ) suggested a high sensitivity of  $[\text{Ca}^{2+}]_{\text{mito}}$  to small changes in  $[\text{Ca}^{2+}]_{\text{cyto}}$  (2). Similar conclusions were suggested also for CSQ-KO mice; however, for this mouse model, these relationships were only extrapolated without using data on  $[\text{Ca}^{2+}]_{\text{mito}}$  and  $[\text{Ca}^{2+}]_{\text{cyto}}$  present in the literature (3–6). While the higher total mitochondrial calcium is consistent with previous data that report an increased  $[\text{Ca}^{2+}]_{\text{mito}}$  in CSQ-KO mice,  $[\text{Ca}^{2+}]_{\text{cyto}}$  was never found to be higher compared with WT mice.

By combining previously published data (1,6), here we aim at exploring further the role of  $[\text{Ca}^{2+}]_{\text{cyto}}$  on mitochondrial  $\text{Ca}^{2+}$  accumulation in resting skeletal muscle fibers and, by means of theoretical and numerical methods, the specific dependence on the local  $\text{Ca}^{2+}$  concentration. Our results suggest that a small, possibly undetectable, difference in the averaged  $[\text{Ca}^{2+}]_{\text{cyto}}$  can be associated with the increment in total and free mitochondrial calcium levels thanks to the existence of the “microdomains,” where the  $[\text{Ca}^{2+}]_{\text{cyto}}$  is locally higher than the average value due to their peculiar position. Their existence is well established during contraction (7) but their role in resting muscle is much less considered.

## The buffering power of mitochondria in WT and CSQ-KO fibers

The free  $[\text{Ca}^{2+}]_{\text{mito}}$  was determined in FDB fibers of CSQ-KO male mice using the cameleon-4mtD3cpv sensor by Scorzeto et al. (6) (see Fig. 1). Males were chosen because they showed a more severe phenotype than females, in particular the hyperthermic crises were more frequent (8,9). In quiescent fibers, the free  $[\text{Ca}^{2+}]_{\text{mito}}$  was higher in CSQ-KO ( $0.23 \mu\text{mol/L}_{\text{mito}}$ ) than in WT ( $0.16 \mu\text{mol/L}_{\text{mito}}$ ). Combining the  $[\text{Ca}^{2+}]_{\text{mito}}$  determined by Scorzeto et al. (6) with the total mitochondrial calcium content determined with the lysis method by Lamboley et al. (1), the buffering power in quiescent CSQ-KO fibers can be quantified as follows.

Extrapolated from Fig. 5 in (1), the values of total mitochondrial calcium per fiber liter are 0.06 and 0.25  $\text{mmol/L}_{\text{fiber}}$  for WT and CSQ-KO, respectively. Assuming a mitochondrial volume of 5% of total fiber volume in WT and 8% (i.e., 60% higher (6,10)) in CSQ-KO, the total calcium concentrations per mitochondria liter become  $0.06/0.05 = 1.2 \text{ mmol/L}_{\text{mito}}$  and  $0.25/0.08 = 3.12 \text{ mmol/L}_{\text{mito}}$  for WT and for CSQ-KO, respectively. The buffering power can therefore be estimated to be  $1200/0.16 \mu\text{mol/L}_{\text{mito}} = 7500$  and

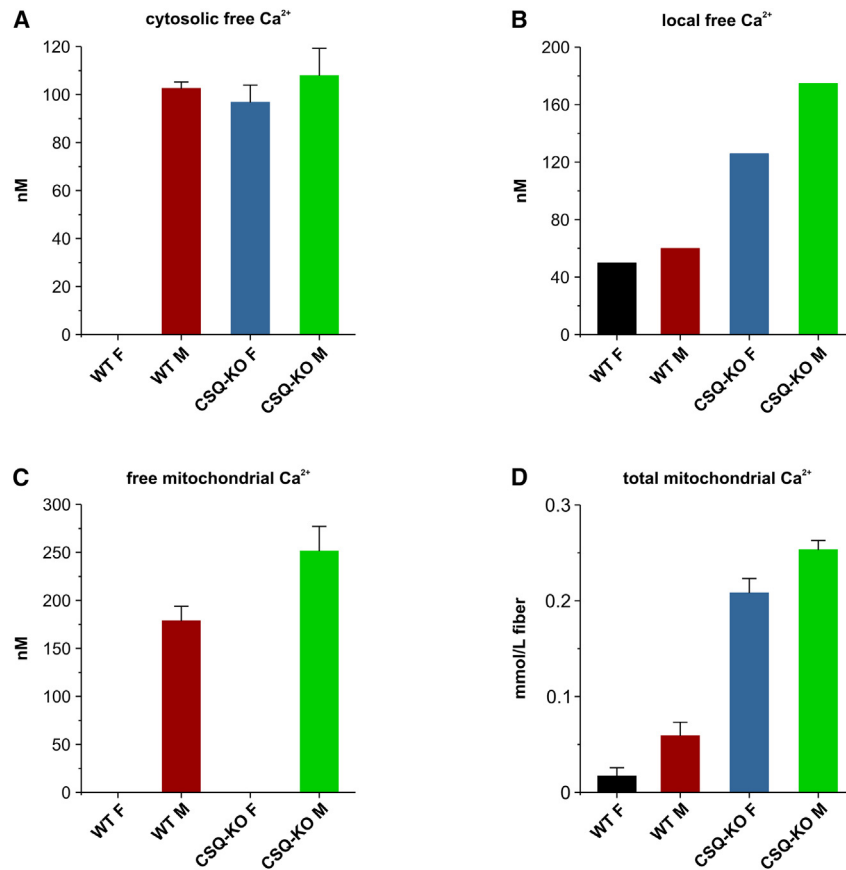

FIGURE 1 (A) Resting cytosolic free  $\text{Ca}^{2+}$  (means  $\pm$  SEM) concentration determined with Fura-2 (5,6), (B) resting local peri-mitochondrial free  $\text{Ca}^{2+}$  concentration estimated by Seng et al. (2), (C) resting free  $\text{Ca}^{2+}$  concentration (means  $\pm$  SEM) in the mitochondrial matrix measured with cameleon 4mtD3cpv (6) and relevant calibration curve, (D) resting total mitochondrial calcium concentration (means  $\pm$  SD) measured with the lysis method by Lamboley et al. (1). No experimental measurements are available for cytosolic concentration in WT females and for mitochondrial concentration in WT and CSQ-KO females (see text).

3120/0.23  $\mu\text{mol/L}_{\text{mito}} = 13565$  for WT and CSQ-KO, respectively. It is worth underlining that the values reported by Scorzeto et al. (6) refer to deletion of both CSQ1 and CSQ2 (double knockout), while the data of Lamboley et al. (1) refer to CSQ1 ablation. Actually, the difference is small as CSQ2 is a minor isoform in fast fibers and, as shown by Tomasi et al. (11), the ablation of CSQ1 alone leads to a reorganization of the terminal cisternae with a severe (up to 80%) reduction of other triadic proteins, among them CSQ2, triadin, and sarcalumenin.

The values of buffering power calculated above are fully comparable with those determined: 1) by Lamboley et al. (1) for skeletal muscle fibers of WT and *RYR1* mutation, 2) by Madsen (12) in mitochondria isolated from human skeletal muscle biopsy, and 3) in liver, brain, and heart (13,14). The higher buffering power in CSQ-KO may be explained through an adaptive response to the genetic ablation of the CSQ. However, it may also be a consequence of a strong cooperativity in the mitochondrial buffers, as is the case for CSQ itself (15,16). A variable buffering power in cardiac mitochondria assuming the presence of multiple molecular species acting as a calcium buffer has been proposed in (14).

### A high cytosolic $\text{Ca}^{2+}$ concentration is needed to increase mitochondrial $\text{Ca}^{2+}$ uptake

$\text{Ca}^{2+}$  enters the inner mitochondrial membrane via the mitochondrial  $\text{Ca}^{2+}$  uniporter (MCU), driven by an electrochemical gradient. Thus, to a first approximation, a higher free  $[\text{Ca}^{2+}]_{\text{mito}}$  should imply a higher  $[\text{Ca}^{2+}]_{\text{cyto}}$ . Accordingly, the interpretation proposed by Lamboley et al. (1) was that the higher total mitochondrial calcium content in CSQ-KO than WT muscles requires a quite higher  $[\text{Ca}^{2+}]_{\text{cyto}}$  in the former case. However, their approach to describe the relationship between total mitochondrial calcium and average free cytosolic  $\text{Ca}^{2+}$ , despite informative, had some limits, which possibly overestimated the needed increase in  $[\text{Ca}^{2+}]_{\text{cyto}}$ . The relationship, substantially based on male CSQ1-KO and heterozygous and homozygous *RYR1* knockin mice data, was shifted to a resting  $[\text{Ca}^{2+}]_{\text{cyto}}$  in WT of only 50 nM, a choice which emphasized the differences between phenotypes. Moreover, as also acknowledged by Lamboley et al. (1), the local  $\text{Ca}^{2+}$  concentration at the mitochondrial microdomain likely plays a crucial role in defining the resting  $[\text{Ca}^{2+}]_{\text{mito}}$ , but this was not considered in that study. As a result, they concluded that a  $[\text{Ca}^{2+}]_{\text{cyto}}$  more than three times higher in CSQ-KO than in WT fibers, was necessary to explain the greater calcium accumulation in the mitochondria. This conclusion is in sharp contrast with the direct measurements, as such a dif-

ference was never detected either with Indo-1 (17,18) or with Fura-2 (3–6), a high-affinity probe with a  $K_d = 145$  nM (data sheet Thermo Fisher), thus perfectly suitable to detect variations of the resting  $[\text{Ca}^{2+}]_{\text{cyto}}$  (see Fig. 1 A).

Importantly, a leaky RyR1 is not sufficient to alter resting  $[\text{Ca}^{2+}]_{\text{cyto}}$  by itself. According to the “cell boundary theorem” (19), steady-state  $[\text{Ca}^{2+}]_{\text{cyto}}$  in quiescent fibers is determined solely by exchanges with the extracellular space through the sarcolemma, while changes of  $\text{Ca}^{2+}$  fluxes within intracellular compartments cannot modify it permanently. In other words,  $[\text{Ca}^{2+}]_{\text{cyto}}$  depends on the balance between  $\text{Ca}^{2+}$  influx and efflux at the plasma membrane, which can be translated in mathematical terms as follows (19):

$$\begin{aligned} \frac{d[\text{Ca}^{2+}]_{\text{cyto}}}{dt} = & \text{influx}([\text{Ca}^{2+}]_{\text{ext}}, [\text{Ca}^{2+}]_{\text{cyto}}) \\ & - \text{efflux}([\text{Ca}^{2+}]_{\text{ext}}, [\text{Ca}^{2+}]_{\text{cyto}}) \\ & - \text{removal}([\text{Ca}^{2+}]_{\text{org}}, [\text{Ca}^{2+}]_{\text{cyto}}) \\ & + \text{release}([\text{Ca}^{2+}]_{\text{org}}, [\text{Ca}^{2+}]_{\text{cyto}}) \end{aligned} \quad (1)$$

where *influx* and *efflux* represent the  $\text{Ca}^{2+}$  exchanged with the external space, and *removal* and *release* the exchanges with a particular organelle *org*. At the truly steady-state, when  $d[\text{Ca}^{2+}]_{\text{cyto}}/dt = 0$ , the last two terms must be equal, and therefore also the first two terms equate each other, so:

$$\text{influx}([\text{Ca}^{2+}]_{\text{ext}}, [\text{Ca}^{2+}]_{\text{cyto}}) = \text{efflux}([\text{Ca}^{2+}]_{\text{ext}}, [\text{Ca}^{2+}]_{\text{cyto}}) \quad (2)$$

which, considering the constancy of  $[\text{Ca}^{2+}]_{\text{ext}}$  and assuming a one-to-one matching between  $[\text{Ca}^{2+}]_{\text{cyto}}$  and the fluxes, leads to the conclusion that only a modification of the exchanges with the external space can regulate  $[\text{Ca}^{2+}]_{\text{cyto}}$ .

Thus, a higher  $[\text{Ca}^{2+}]_{\text{cyto}}$  would require either a decreased efflux, via the  $\text{Na}^+/\text{Ca}^{2+}$  exchanger or the plasma membrane  $\text{Ca}^{2+}$  ATPase (PMCA), or an enhanced influx via store-operated  $\text{Ca}^{2+}$  entry (SOCE). Lamboley et al. (1) have shown an altered  $\text{Ca}^{2+}$  permeability of the transverse tubular system membrane. A constitutively active SOCE through the recently described intracellular SR/transverse-tubule junctions at the I band of the sarcomere named  $\text{Ca}^{2+}$  entry units, was reported in both fast- and slow-twitch fibers from CSQ-KO mice, likely as a compensative mechanism for the massive reduction of total SR calcium content observed in these animals (20,21).

These modifications can then be responsible for an altered  $[Ca^{2+}]_{cyto}$ , but for a quantitative understanding of their role we must consider also the influence of the steady-state  $Ca^{2+}$  gradients generated by RyR1 leaks, as shown in the next section.

### In fibers with leaky SR, mitochondria might take up $Ca^{2+}$ from microdomains

In understanding the discrepancy between higher mitochondrial  $Ca^{2+}$  concentration and unchanged free  $[Ca^{2+}]_{cyto}$  we noted that measurements of  $[Ca^{2+}]_{cyto}$  at rest, carried out with Fura-2 or other probes, only yielded an average or pooled  $[Ca^{2+}]_{cyto}$ . As we discussed in a recent review (22), at the mitochondria-CRU microdomain distance ( $\sim 140$  nm) (23) a free  $Ca^{2+}$  concentration higher than the pooled or averaged cytosolic concentration can be expected, not only during  $Ca^{2+}$  release events but also in the presence of  $Ca^{2+}$  leakage.

In the “global version” of the cell boundary theorem reported above, in Eqs. 1 and 2, without a structural modification of the channels/pumps that support efflux and influx, the two fluxes keep a constant dependence of  $[Ca^{2+}]_{cyto}$  on  $[Ca^{2+}]_{ext}$ , and therefore any perturbation is fated to reach the sole value that equilibrates the two fluxes. However, as already noted by Ríos (19), in the presence of gradients within the cell, Eq. 1 is true only after “integration over the entire plasmalemma.” Alternatively, considering that the exchanges occur in a finite number of structures, we can write:

$$\begin{aligned} \frac{d[Ca^{2+}]_{cyto}}{dt} = & \sum_{ic} \left[ \text{influx} \left( [Ca^{2+}]_{ext}, [Ca^{2+}]_{cyto}^{ic} \right) \right] \\ & - \sum_{ec} \left[ \text{efflux} \left( [Ca^{2+}]_{ext}, [Ca^{2+}]_{cyto}^{ec} \right) \right] \\ & - \text{removal} \left( [Ca^{2+}]_{org}, [Ca^{2+}]_{cyto} \right) \\ & + \text{release} \left( [Ca^{2+}]_{org}, [Ca^{2+}]_{cyto} \right) \end{aligned} \quad (3)$$

This “local version” of the cell boundary theorem considers the local  $[Ca^{2+}]_{cyto}$  in front of each influx (ic) or efflux (ec) channel/pump. The local version of the theorem is equivalent to the global version if we include a function “ $g$ ,” which, accounting for the geometrical and diffusional constraint in the cell, links the two concentrations through  $[Ca^{2+}]_{cyto}^{ic/ec} = g([Ca^{2+}]_{cyto})$ . In this way, the new equation is again a function of the sole variable  $[Ca^{2+}]_{cyto}$  in the steady state. However, if the gradient generated by a different value of the *removal* and *release* fluxes is big enough to sensibly affect the function  $g$ ,

then the modification has an implicit effect also on the shape of the influx ( $g([Ca^{2+}]_{cyto})$ ) and efflux ( $g([Ca^{2+}]_{cyto})$ ), pointing to a different value for the  $[Ca^{2+}]_{cyto}$  at the equilibrium.

The previous reasoning implies that the effects of changes in the internal fluxes on the average  $[Ca^{2+}]_{cyto}$  can only be evaluated taking into account also the local  $[Ca^{2+}]$  gradients. Therefore, we quantified the magnitude of the  $[Ca^{2+}]$  gradient with a diffusion rate of  $Ca^{2+}$  equal to  $3 \times 10^{-6}$  cm<sup>2</sup>/s (24), generated by a leaky RyR1 in a quiescent sarcomere, of 2.5  $\mu$ m length and 0.5  $\mu$ m radius, improving our previous diffusional model (see supporting material) of a half-sarcomere of a WT fast skeletal muscle, which includes the major buffers and organelles, and refining the mesh with 50 longitudinal and 20 radial compartments (25). We progressively included into the model the inward and outward fluxes to explore their contribution to the local  $Ca^{2+}$  concentration. In each version of the model we kept fixed the uptake capacity of the SERCA pumps, described as a series of saturable first-order pumps distributed along the SR with maximum cumulative uptake rate of 5.6 mmol/s/L<sub>fiber</sub> at 25°C (from 4 mmol/s/L<sub>fiber</sub> at 20°C with  $Q_{10} = 2$ ) and  $K_d = 0.5$   $\mu$ M (26). As a simplest case (Fig. 2, case 1) we hypothesized that the leakage of the RyR1, located on the SR at 500 nm from the Z-line, as it is the case for mammalian, and specifically mice, fast skeletal muscle (27), is fully balanced by the continuous uptake of the SERCA pumps. When the constant rate of the RyR1 leak is modulated to keep the average  $[Ca^{2+}]_{cyto}$  at the resting level of 100 nM, the resulting local  $[Ca^{2+}]$  in the microdomain close to mitochondria is about 50% higher. The calculated RyR1 leakage resulted to be 255  $\mu$ mol/s/L<sub>fiber</sub>.

This was, however, the simplest case, which did not include  $Ca^{2+}$  influx and efflux across the sarcolemma. To reach a more realistic situation, we included first a non-RyR1 leakage in the SR, which can account for three-fourths of the total reuptake of SERCA in resting muscle, as estimated by Barclay and Launikonis starting from the rate of heat output from noncontracting human forearm muscles (26). In this case (Fig. 2, case 2), the constant RyR1 leak calculated to keep the  $[Ca^{2+}]_{cyto}$  resting level at 100 nM was lower and the local  $[Ca^{2+}]$  in the mitochondrial microdomain was 20% higher than that level. Moreover, the gradient was even more reduced when we included in the model the  $Ca^{2+}$  exchange with the extracellular space. We hypothesized (Fig. 2, case 3) an extrusion of  $Ca^{2+}$  through the PMCA of the 10% of the total RyR1 leakage (26), located in the junctional space, i.e., same cytosolic compartment of the RyR1, balanced by a series of influxes disposed along the SR, to mimic the SOCE. The localization of these outward and inward fluxes



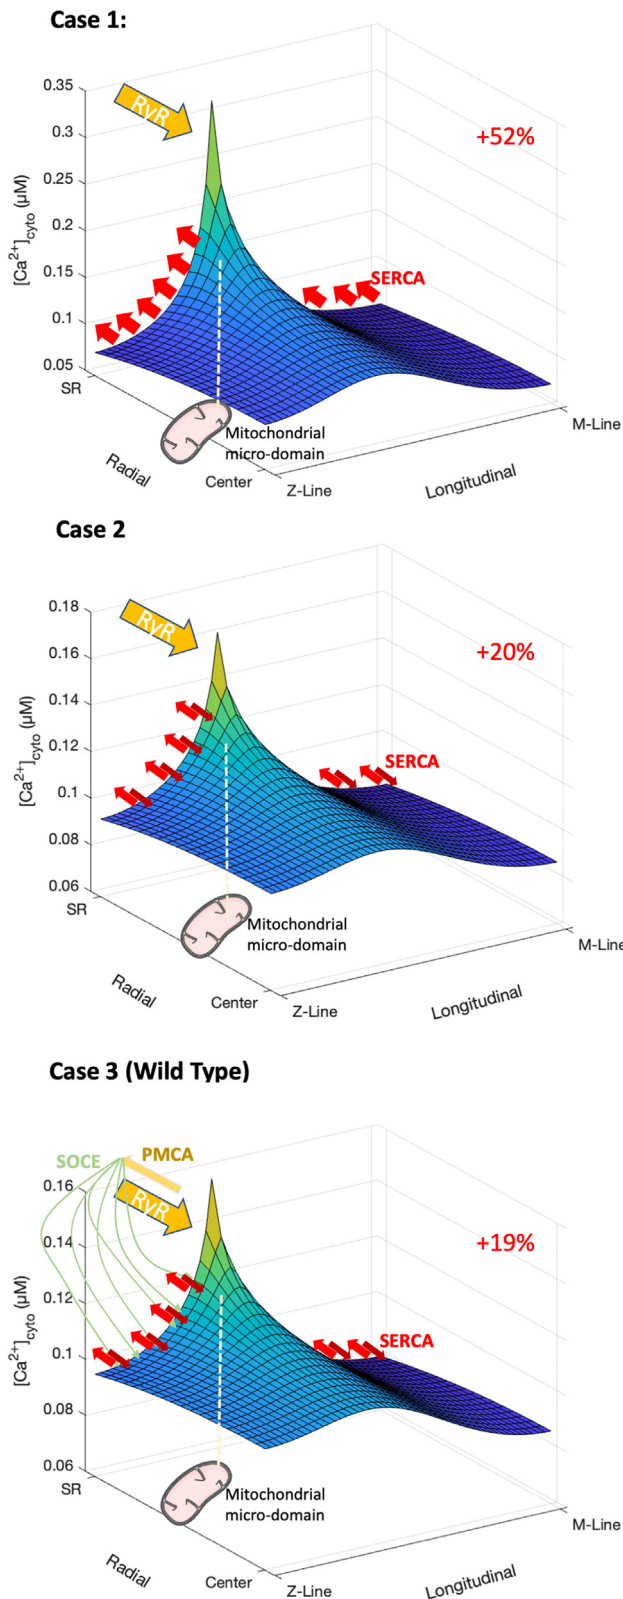

FIGURE 2 Cytosolic  $[Ca^{2+}]$  in a quiescent half-sarcomere of a fast-twitch WT mouse fiber with increasing complexity of the internal and external  $Ca^{2+}$  fluxes. Case 1: the leakage of the RyR1, located on the SR at 500 nm from the Z-line, is fully balanced by the continuous up-

reduces the gradient generated by the RyR1 leak, creating a sort of shortcut in the mathematical model, bringing an amount of  $Ca^{2+}$  from the triad directly to the uptake compartments. Although relatively small, it is sufficient to reduce the gradient in the local  $[Ca^{2+}]$  of the mitochondrial microdomain, which is now 19% higher than the bulk level. We considered this last case as representative of the WT cells. The RyR1 leakage, which keeps the average  $[Ca^{2+}]_{cyto}$  to 100 nM in this more realistic case, is computed to be about  $50 \mu\text{M}/\text{s}/L_{\text{fiber}}$  (Table 1). This value is compatible with the value of  $17 \mu\text{mol}/\text{s}/L_{\text{fiber}}$  obtained in the model proposed in (1) considering that in that study a basal level of  $[Ca^{2+}]_{cyto}$  of only 50 nM has been imposed.

Next, we used the model to estimate the sole effect of an increased RyR1 leakage, as observed in CSQ-KO muscles, on both the average  $[Ca^{2+}]_{cyto}$  and on the local  $[Ca^{2+}]$  of the mitochondrial microdomain. Although the CSQ ablation possibly affects to a different extent several model parameters, we adopted a *ceteris paribus* approach, where the estimated increase in RyR1 leakage is the sole parameter modified along with the absence of the CSQ buffer in the SR. We aimed at showing how much the increase in RyR1 leakage alone can influence the mitochondrial  $Ca^{2+}$  uptake. First, we explored the impact of a fivefold increase of the leakage. This means a constant leak of  $250 \mu\text{mol}/\text{s}/L_{\text{fiber}}$ , close to what was estimated by a previous work for CSQ-KO cells ( $238.5 \mu\text{mol}/\text{s}/L_{\text{fiber}}$ ) (1). Without further modifications of other fluxes, the increased RyR1 leak generates an average  $[Ca^{2+}]_{cyto}$  of 142 nM, with an increase of the  $[Ca^{2+}]$  in the mitochondrial microdomains of +35% (192 nM, Fig. 3, case 4). When the RyR1 leakage is chronically raised, a simultaneous increase in  $Ca^{2+}$  extrusion, through PMCA, and reuptake, through SOCE, is observed (28). PMCA is very close to RyR1 and highly sensitive to local  $[Ca^{2+}]$  in the junctional space (1), while SOCE, activated to keep constant the SR  $Ca^{2+}$  content,

take by the SERCA pumps, described as a series of saturable first-order pumps distributed along the SR with maximum cumulative uptake rate of  $4 \text{ mmol}/\text{s}/L_{\text{fiber}}$  and  $K_d = 0.5 \mu\text{M}$  (26). The constant rate of the RyR1 leak is modulated to keep the average cytosolic  $[Ca^{2+}]$  at the physiological level of 100 nM. The position of the RyR1 is indicated by the yellow arrow, the red arrows indicate the positions of the SERCA. The white dashed line indicates the likely location of the closest compartment of an intermyofibrillar mitochondrion at 140 nm from the CRU (23). Case 2 introduces a non-RyR1 leakage in the SR of 75% of the SERCA uptake rate. Case 3 includes also  $Ca^{2+}$  fluxes with the extracellular space and can represent the WT situation. Percentages in red indicate the increase in the local mitochondrial microdomain concentration with respect to the bulk level.

For a Figure360 author presentation of this figure, see <https://doi.org/10.1016/j.bpr.2023.100117>. Figure360>

**TABLE 1** Comparison of the fluxes and  $\text{Ca}^{2+}$  concentrations in the WT and in the CSQ-KO with two different leaks in the RyR (see text)

|                   | RyR1<br>( $\mu\text{M}/\text{s}$ ) | $[\text{Ca}^{2+}]_{\text{cyto}}$<br>(nM) | $[\text{Ca}^{2+}]_{\text{microdomain}}$<br>(nM) | $[\text{Ca}^{2+}]_{\text{mito}}$<br>nM |
|-------------------|------------------------------------|------------------------------------------|-------------------------------------------------|----------------------------------------|
| WT                | 50                                 | 100                                      | 119                                             | 160                                    |
| RyR1 $\times 2.3$ | 130                                | 117                                      | 140                                             | 230                                    |
| RyR1 $\times 5$   | 250                                | 142                                      | 189                                             | 420                                    |

releases  $\text{Ca}^{2+}$  in a close proximity with the SERCA (29). When we included a faster  $\text{Ca}^{2+}$  exchange with the extracellular space, as previously observed in this mouse model (20), increasing the extracellular flux from 10 to 50% of the RyR1 leak in the WT case, the average  $[\text{Ca}^{2+}]_{\text{cyto}}$  value was almost unaffected, while the local  $[\text{Ca}^{2+}]$  of the mitochondrial microdomain decreased to 189 nM (+33% with respect to the bulk value, Fig. 3, case 5). Interestingly, this local value is very close to the  $\text{Ca}^{2+}$  concentration extrapolated in (1) from the relationship between total mitochondrial calcium and average  $[\text{Ca}^{2+}]_{\text{cyto}}$  as described above.

Our simulation predicts that the presence of higher local  $[\text{Ca}^{2+}]$  might provide an acceptable explanation of the  $[\text{Ca}^{2+}]_{\text{mito}}$  higher in CSQ-KO than in WT even in the presence of a similar resting global  $[\text{Ca}^{2+}]_{\text{cyto}}$ . Interestingly, the privileged location of the mitochondria suggests that, in the presence of leakage from SR, they might contribute to stabilize or prevent increase in average  $[\text{Ca}^{2+}]_{\text{cyto}}$  and, at the same time, enhance the leakage via ROS and RNS generation. The cystein thiol groups of RyR1 and SERCA are well-known targets of ROS/RNS (for a review, see (30)). In addition, the increased free  $[\text{Ca}^{2+}]_{\text{mito}}$  would boost ATP production, which is beneficial to support the SERCA-mediated SR refilling. The recent demonstration that RyR1  $\text{Ca}^{2+}$  leak determines a standing  $[\text{Ca}^{2+}]$  gradient between RyR1 and SERCA (31) is consistent with this view.

### The $\text{Ca}^{2+}$ uptake via MCU is not the only determinant of mitochondrial calcium content

Next, we made an attempt to estimate the resting  $[\text{Ca}^{2+}]_{\text{mito}}$  generated by the different gradient in  $[\text{Ca}^{2+}]_{\text{cyto}}$  in WT and in CSQ-KO cases including into the model a mitochondrial compartment located at about 140 nm from the RyR1. In this context it is worth underlining that intramitochondrial free and total calcium concentrations are not simply determined by the influx via the MCU complex driven by the  $\text{Ca}^{2+}$  electrochemical gradient. The kinetic balance of  $\text{Ca}^{2+}$  accumulation by mitochondria can be described more correctly by the equation

**Case 4**

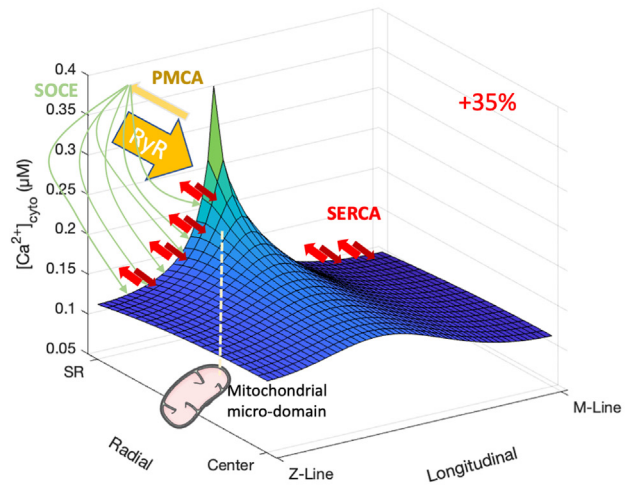

**Case 5 (CSQ-KO)**

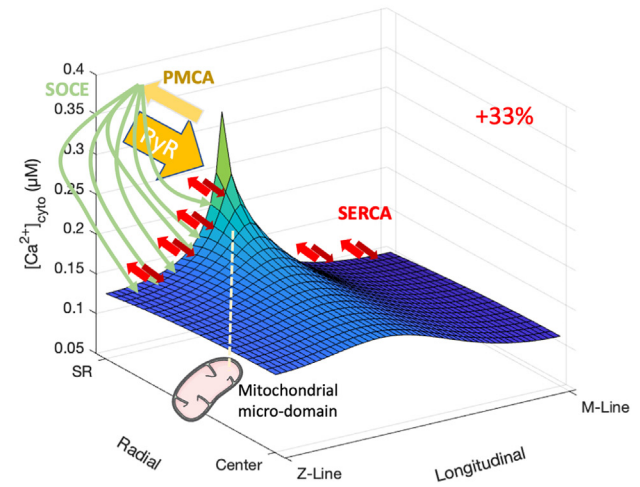

**FIGURE 3** Cytosolic  $[\text{Ca}^{2+}]$  in a quiescent half-sarcomere of a fast-twitch CSQ-KO mouse fiber with increasing complexity of the internal and external  $\text{Ca}^{2+}$  fluxes. Description as in Fig. 2, with an increased RyR1 leak of a factor of 5. Case 4:  $\text{Ca}^{2+}$  exchange with the extracellular space is kept as in the WT case 3. Case 5 accounts for a greater  $\text{Ca}^{2+}$  exchange with the extracellular space, representative of the CSQ-KO situation.

$$\frac{d[\text{Ca}^{2+}]_{\text{mito}}}{dt} = J_{in} - J_{out} - J_b \quad (4)$$

where  $J_b = \Sigma(k_{on}[\text{Ca}^{2+}]_{\text{mito}}[B_{\text{tot}} - B_{\text{Ca}}] - k_{off}[B_{\text{Ca}}])$ ,  $k_{on}$ , and  $k_{off}$  are the rate constants of the buffer, and  $B_{\text{tot}}$  and  $B_{\text{Ca}}$  are the total and  $\text{Ca}^{2+}$ -bound concentrations, respectively, of intramitochondrial buffers (see (22)).

As underlined by Eq. 4, the mitochondrial ability to accumulate  $\text{Ca}^{2+}$  does not depend only on the MCU-mediated influx, but also on the buffer capacity and on outflow via the sodium-calcium-lithium exchanger

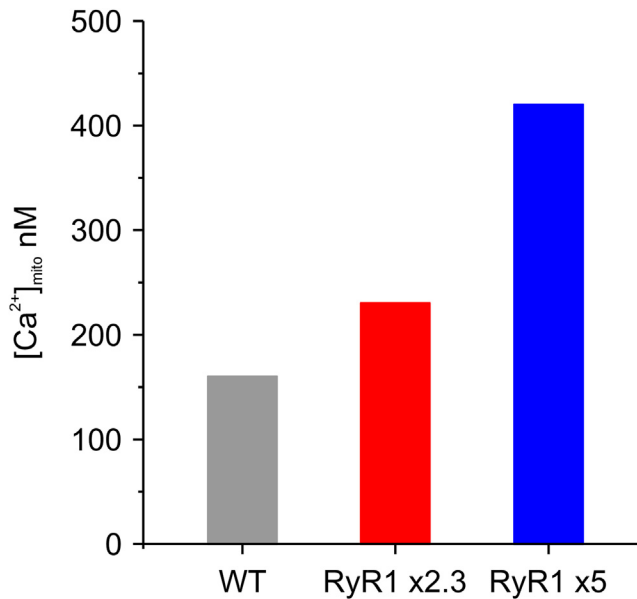

FIGURE 4 Mitochondrial free calcium concentration in WT and in CSQ-KO with two different RyR1 leakages, 2.3 and 5 times greater, respectively, than in WT.

(NCLX) or via permeability transition pore. It is plausible that the increased SR Ca<sup>2+</sup> leakage determined by constitutive ablation of CSQ or gain-of-function *RYR1* mutations could induce adaptive response of the mitochondria. An increased mitochondrial density has been observed in CSQ-KO fibers (10) and swollen mitochondria can be found in fibers with *RYR1* mutations (32). As discussed above, the comparison between the total and free mitochondrial calcium determined by our group and others points to an increased buffer capacity in CSQ-KO fibers, eventually reducing the free Ca<sup>2+</sup> during transient states. An increased influx, or a decreased efflux, can instead increase [Ca<sup>2+</sup>]<sub>mito</sub> in resting CSQ-KO fibers. However, lacking experimental data, and with the aim of analyzing the effect of RyR1 leakage in a *ceteris paribus* approach, in the following we kept the values of MCU and NCLX parameters equal in WT and CSQ-KO. Thus, in an attempt to reproduce the balance of these two fluxes in WT and CSQ-KO cells, we simulated MCU as a saturable first-order kinetics, with  $V_{\max} = 22.4 \mu\text{mol/s/L}_{\text{fiber}}$  (from (33) adapted at 25°C with a Q10 of 2) and cooperativity of 2 (25), while Ca<sup>2+</sup> extruded through NCLX was simulated as proposed in (34) with a 3:1 stoichiometry for Na<sup>+</sup> and Ca<sup>2+</sup>. Maximum extrusion velocity was imposed to match the measured resting [Ca<sup>2+</sup>]<sub>mito</sub> in WT of 160 nM (6). Cooperativity in the MCU Ca<sup>2+</sup> uptake represents the changes in the calcium affinity of the MCU induced by [Ca<sup>2+</sup>]<sub>cyto</sub> via MICU1/2 subunits (35). Keeping these values constant, the model indicated that the predicted increase of local [Ca<sup>2+</sup>] in the mitochondrial

microdomain with a fivefold increase of RyR1 leak would lead to a resting [Ca<sup>2+</sup>]<sub>mito</sub> of 420 nM, higher than that observed experimentally by Scorsetto et al. (6). A value closer to that seen experimentally (230 nM) was reached imposing a factor of 2.3 in the RyR1 leak in CSQ-KO compared with WT (Fig. 4). This value required a local [Ca<sup>2+</sup>] in the mitochondrial microdomain at 140 nM, and the average [Ca<sup>2+</sup>]<sub>cyto</sub> to 117 nM, only 17% higher than the WT counterpart, and possibly below the resolution obtained experimentally with Fura-2 measurements (Table 1).

## CONCLUSION

The present results contribute to the quantitative understanding of how local gradients or hotspots/microdomains are generated, not only during contraction but also at rest, and how relevant they are to mitochondrial Ca<sup>2+</sup> regulation.

Some limits must be acknowledged both for the numerical model and for the experimental data. Parameters for the maximum fluxes and cooperativities are still under debate in literature and their mathematical representation is necessarily a simplification of the real events. This is particularly true for the mitochondrial model, where the Na<sup>+</sup> and H<sup>+</sup> homeostasis is not considered as well as possible variation in the membrane potential.

Our *ceteris paribus* approach, which imposed for the CSQ-KO simulations the same parameters used for the WT case, except for the RyR1 leakage, allowed to highlight the crucial role of the RyR1 leakage in determining the mitochondrial calcium content at rest. We acknowledge that modifications in the mitochondrial Ca<sup>2+</sup> buffer, influx, or efflux would also affect [Ca<sup>2+</sup>]<sub>mito</sub> but, to the best of our knowledge, these adaptive alterations due to genetic ablation of the CSQ are not quantitatively characterized experimentally. An extension of the model to include these effects is left for future work. Finally, the existence of a MCU “threshold,” as a minimum level of [Ca<sup>2+</sup>]<sub>cyto</sub> that triggers the MCU Ca<sup>2+</sup> influx, has been hypothesized (36) but, since its existence is still under debate (37), we decided to include these effects in the model through the imposed MCU cooperativity.

As to experimental determination of cytosolic and free mitochondrial [Ca<sup>2+</sup>], it is important to underline the differences between male and female mice in both WT and CSQ-KO (see Fig. 1). Malignant hyperthermia crises occurred much less frequently in females when exposed to anesthetics or to high environmental temperature (8,9). The data suggested that a better redox control in females can explain the sex-related difference (3–5). Similarly to *RYR1* mutations (32), in



CSQ-KO fibers, the  $\text{Ca}^{2+}$  leakage increases ROS/RNS production, which in turn enhances RyR1 permeability via nitrosylation of cysteine residues (3). It is also worth noting that another important factor is the temperature. The free  $[\text{Ca}^{2+}]_{\text{cyto}}$  and free  $[\text{Ca}^{2+}]_{\text{mito}}$  measurements (5,6), as well as of the total mitochondrial calcium (1,2) in the CSQ-KO model, were obtained at room temperature (25°C). In muscle fibers with leaky RyR1, no difference in  $[\text{Ca}^{2+}]_{\text{cyto}}$  is present at low temperature (38). The difference appears only when temperature is increased toward physiological values (32,39). Finally, the determinations of  $[\text{Ca}^{2+}]_{\text{cyto}}$  were performed in fibers dissociated with collagenase (6), which are partially depolarized (resting potential close to -60 mV, (40)) and this possibly affects the  $\text{Na}^+/\text{Ca}^{2+}$  exchanger both in CSQ-KO and WT.

Nonetheless, the model prediction demonstrates that the gradients between the CRU and the closest intermyofibrillar mitochondria due to the continuous leakage provides the link to the free and total mitochondrial calcium in resting skeletal muscle. Moreover, the presence of local variations of  $[\text{Ca}^{2+}]_{\text{cyto}}$  at rest explains how the enhanced leakage may not affect substantially the average  $[\text{Ca}^{2+}]_{\text{cyto}}$ . Considering local values is then a necessary step in estimating the average  $[\text{Ca}^{2+}]_{\text{cyto}}$  in CSQ-KO fibers. This is critical, especially in view of the proposed mechanism that the augmented RyR1 leak could be functional in presaturating the troponin to preserve a normal force production despite the reduced SR calcium content and  $\text{Ca}^{2+}$  release in CSQ-KO fibers (1,10,17).

It is finally worth recalling that mitochondrial  $\text{Ca}^{2+}$  concentration is of outmost relevance for many biological processes such as regulation of ATP resynthesis, apoptosis, and proteostasis in health and disease (41,42). The control of mitochondrial  $\text{Ca}^{2+}$  in skeletal muscles is still debated, but there are clear indications that  $\text{Ca}^{2+}$  leakage from the SR leads to increased  $[\text{Ca}^{2+}]_{\text{mito}}$ , possibly enhancing ROS/RNS production and inducing mitochondrial dysfunction (43,44). In this regard, the role of MCU, electrochemical gradient, and local  $[\text{Ca}^{2+}]_{\text{cyto}}$  is not exhaustive and other components such as the  $\text{Ca}^{2+}$  efflux from mitochondria would require more attention.

## SUPPORTING MATERIAL

Supplemental information can be found online at <https://doi.org/10.1016/j.bpr.2023.100117>.

## AUTHOR CONTRIBUTIONS

L.M., C.R., and A.M. designed the research. L.M. performed numerical simulation. L.M., C.R., and A.M. analyzed the data. L.M., C.R., and A.M. wrote the paper.

## ACKNOWLEDGMENTS

This work was funded by the European Union via Horizon 2020 Research and Innovation Programme under the Marie Skłodowska-Curie grant agreement no. 886232 to L.M. We acknowledge the CINECA award under the ISCRA initiative for providing high-performance computing resources and support in the project HP10C6U-SIW. The code used for the mathematical model of the calcium diffusion in a resting sarcomere is available at <https://github.com/lorenzomarcucci/Skeletal-CalDiff>.

## DECLARATION OF INTERESTS

No conflicts of interest, financial or otherwise, are declared by the authors.

## REFERENCES

1. Lamboley, C. R., L. Pearce, ..., B. S. Launikonis. 2021. Ryanodine receptor leak triggers fiber  $\text{Ca}^{2+}$  redistribution to preserve force and elevate basal metabolism in skeletal muscle. *Sci. Adv.* 7, eabi7166.
2. Seng, C., L. Pearce, ..., B. S. Launikonis. 2022. Tiny changes in cytoplasmic  $[\text{Ca}^{2+}]$  cause large changes in mitochondrial  $\text{Ca}^{2+}$ : What are the triggers and functional implications? *Am. J. Physiol. Cell Physiol.* 323:C1285–C1289.
3. Michelucci, A., C. Paolini, ..., F. Protasi. 2015. Antioxidants protect Calsequestrin-1 knockout mice from halothane- and heat-induced sudden death. *Anesthesiology.* 123:603–617.
4. Paolini, C., M. Quarta, ..., F. Protasi. 2015. Oxidative stress, mitochondrial damage, and cores in muscle from Calsequestrin-1 knockout mice. *Skeletal Muscle.* 5:10.
5. Michelucci, A., S. Boncompagni, ..., F. Protasi. 2017. Estrogens protect Calsequestrin-1 knockout mice from lethal hyperthermic episodes by reducing oxidative stress in muscle. *Oxid. Med. Cell. Longev.* 2017, 6936897.
6. Scorzeto, M., M. Giacomello, ..., G. J. M. Stienen. 2013. Mitochondrial  $\text{Ca}^{2+}$ -handling in fast skeletal muscle fibers from wild type and calsequestrin-null mice. *PLoS One.* 8, e74919.
7. Rizzuto, R., and T. Pozzan. 2006. Microdomains of intracellular  $\text{Ca}^{2+}$ : Molecular determinants and functional consequences. *Physiol. Rev.* 86:369–408.
8. Dainese, M., M. Quarta, ..., F. Protasi. 2009. Anesthetic- and heat-induced sudden death in Calsequestrin-1-knockout mice. *FASEB J.* 23:1710–1720.
9. Protasi, F., C. Paolini, and M. Dainese. 2009. Calsequestrin-1: A new candidate gene for malignant hyperthermia and exertional/environmental heat stroke. *J. Physiol.* 587:3095–3100.
10. Paolini, C., M. Quarta, ..., F. Protasi. 2007. Reorganized stores and impaired calcium handling in skeletal muscle of mice lacking Calsequestrin-1: Calsequestrin role in skeletal muscle. *J. Physiol.* 583:767–784.
11. Tomasi, M., M. Canato, ..., A. Nori. 2012. Calsequestrin (CASQ1) rescues function and structure of calcium release units in skeletal muscles of CASQ1-null mice. *Aust. J. Pharm. Cell Physiol.* 302:C575–C586.
12. Madsen, K., P. Ertbjerg, ..., P. K. Pedersen. 1996. Calcium content and respiratory control index of skeletal muscle mitochondria during exercise and recovery. *Am. J. Physiol.* 271. E1044–1050.
13. Chalmers, S., and D. G. Nicholls. 2003. The relationship between free and total calcium concentrations in the matrix of liver and brain mitochondria. *J. Biol. Chem.* 278:19062–19070.



14. Bazil, J. N., C. A. Blomeyer, ..., R. K. Dash. 2013. Modeling the calcium sequestration system in isolated guinea pig cardiac mitochondria. *J. Bioenerg. Biomembr.* 45:177–188.
15. Royer, L., M. Sztretye, ..., E. Ríos. 2010. Paradoxical buffering of calcium by calsequestrin demonstrated for the calcium store of skeletal muscle. *J. Gen. Physiol.* 136:325–338.
16. Fénelon, K., C. R. H. Lamboley, ..., P. C. Pape. 2012. Calcium buffering properties of sarcoplasmic reticulum and calcium-induced Ca<sup>2+</sup> release during the quasi-steady level of release in twitch fibers from frog skeletal muscle. *J. Gen. Physiol.* 140:403–419.
17. Olojo, R. O., A. P. Ziman, ..., C. W. Ward. 2011. Mice null for calsequestrin 1 exhibit deficits in functional performance and sarcoplasmic reticulum calcium handling. *PLoS One.* 6, e27036.
18. Mosca, B., O. Delbono, ..., F. Zorzato. 2013. Enhanced dihydropyridine receptor calcium channel activity restores muscle strength in JP45/CASQ1 double knockout mice. *Nat. Commun.* 4:1541.
19. Ríos, E. 2010. The cell boundary theorem: A simple law of the control of cytosolic calcium concentration. *J. Physiol. Sci.* 60:81–84.
20. Michelucci, A., S. Boncompagni, ..., R. T. Dirksen. 2020. Pre-assembled Ca<sup>2+</sup> entry units and constitutively active Ca<sup>2+</sup> entry in skeletal muscle of Calsequestrin-1 knockout mice. *J. Gen. Physiol.* 152, e202012617.
21. Michelucci, A., L. Pietrangelo, ..., S. Boncompagni. 2022. Constitutive assembly of Ca<sup>2+</sup> entry units in soleus muscle from calsequestrin knockout mice. *J. Gen. Physiol.* 154, e202213114.
22. Reggiani, C., and L. Marcucci. 2022. A controversial issue: Can mitochondria modulate cytosolic calcium and contraction of skeletal muscle fibers? *J. Gen. Physiol.* 154, e202213167.
23. Boncompagni, S., A. E. Rossi, ..., F. Protasi. 2009. Mitochondria are linked to calcium stores in striated muscle by developmentally regulated tethering structures. *Mol. Biol. Cell.* 20:1058–1067.
24. Cannell, M. B., and D. G. Allen. 1984. Model of calcium movements during activation in the sarcomere of frog skeletal muscle. *Biophys. J.* 45:913–925.
25. Marcucci, L., M. Canato, ..., C. Reggiani. 2018. A 3D diffusional-compartmental model of the calcium dynamics in cytosol, sarcoplasmic reticulum and mitochondria of murine skeletal muscle fibers. *PLoS One.* 13, e0201050.
26. Barclay, C. J., and B. S. Launikonis. 2021. Components of activation heat in skeletal muscle. *J. Muscle Res. Cell Motil.* 42:1–16.
27. Flucher, B. E. 1992. Structural analysis of muscle development: transverse tubules, sarcoplasmic reticulum, and the triad. *Dev. Biol.* 154:245–260.
28. Pearce, L., A. Meizoso-Huesca, ..., B. S. Launikonis. 2022. Ryanodine receptor activity and store-operated Ca<sup>2+</sup> entry: Critical regulators of Ca<sup>2+</sup> content and function in skeletal muscle. *J. Physiol.* <https://doi.org/10.1113/JP279512>.
29. Protasi, F., B. Girolami, ..., C. Paolini. 2022. Ablation of Calsequestrin-1, Ca<sup>2+</sup> unbalance, and susceptibility to heat stroke. *Front. Physiol.* 13:1033300.
30. Csordás, G., and G. Hajnóczky. 2009. SR/ER-mitochondrial local communication: Calcium and ROS. *Biochim. Biophys. Acta.* 1787:1352–1362.
31. Meizoso-Huesca, A., L. Pearce, ..., B. S. Launikonis. 2022. Ca<sup>2+</sup> leak through ryanodine receptor 1 regulates thermogenesis in resting skeletal muscle. *Proc. Natl. Acad. Sci. USA.* 119, e2119203119.
32. Durham, W. J., P. Aracena-Parks, ..., S. L. Hamilton. 2008. RyR1 S-nitrosylation underlies environmental heat stroke and sudden death in Y522S RyR1 knockin mice. *Cell.* 133:53–65.
33. Baylor, S. M., and S. Hollingworth. 2007. Simulation of Ca<sup>2+</sup> movements within the sarcomere of fast-twitch mouse fibers stimulated by action potentials. *J. Gen. Physiol.* 130:283–302.
34. Dash, R. K., and D. A. Beard. 2008. Analysis of cardiac mitochondrial Na<sup>+</sup>-Ca<sup>2+</sup> exchanger kinetics with a biophysical model of mitochondrial Ca<sup>2+</sup> handling suggests a 3: 1 stoichiometry: Characterization of mitochondrial NCE stoichiometry. *J. Physiol.* 586:3267–3285.
35. Vais, H., R. Payne, ..., J. K. Foskett. 2020. Coupled transmembrane mechanisms control MCU-mediated mitochondrial Ca<sup>2+</sup> uptake. *Proc. Natl. Acad. Sci. USA.* 117:21731–21739.
36. Mallilankaraman, K., C. Cárdenas, ..., M. Madesh. 2012. MCUR1 is an essential component of mitochondrial Ca<sup>2+</sup> uptake that regulates cellular metabolism. *Nat. Cell Biol.* 14:1336–1343.
37. Boyman, L., M. Greiser, and W. J. Lederer. 2021. Calcium influx through the mitochondrial calcium uniporter holocomplex, MCUcx. *J. Mol. Cell. Cardiol.* 151:145–154.
38. Chelu, M. G., S. A. Goonasekera, ..., S. L. Hamilton. 2006. Heat and anesthesia-induced malignant hyperthermia in an RyR1 knock-in mouse. *FASEB J.* 20:329–330.
39. Lanner, J. T., D. K. Georgiou, ..., S. L. Hamilton. 2012. AICAR prevents heat-induced sudden death in RyR1 mutant mice independent of AMPK activation. *Nat. Med.* 18:244–251.
40. Canato, M., M. Dal Maschio, ..., A. Megighian. 2010. Mechanical and electrophysiological properties of the sarcolemma of muscle fibers in two murine models of muscle dystrophy: col6a1<sup>-/-</sup> and mdx. *J. Biomed. Biotechnol.* 2010, 981945.
41. Hood, D. A., J. M. Memme, ..., M. Triolo. 2019. Maintenance of skeletal muscle mitochondria in health, exercise, and aging. *Annu. Rev. Physiol.* 81:19–41.
42. De Mario, A., G. Gherardi, ..., C. Mammucari. 2021. Skeletal muscle mitochondria in health and disease. *Cell Calcium.* 94, 102357.
43. Boncompagni, S., A. E. Rossi, ..., F. Protasi. 2009. Characterization and temporal development of cores in a mouse model of malignant hyperthermia. *Proc. Natl. Acad. Sci. USA.* 106:21996–22001.
44. Canato, M., P. Capitanio, ..., C. Reggiani. 2019. Excessive accumulation of Ca<sup>2+</sup> in mitochondria of Y522S-RYR1 knock-in mice: A link between leak from the sarcoplasmic reticulum and altered redox state. *Front. Physiol.* 10:1142.

**Biophysical Reports, Volume 3**

**Supplemental information**

**Cytosolic  $\text{Ca}^{2+}$  gradients and mitochondrial  $\text{Ca}^{2+}$  uptake in resting muscle fibers: A model analysis**

**Lorenzo Marcucci, Antonio Michelucci, and Carlo Reggiani**

## Supplementary text

Numerical data was obtained using an improved version of our model for calcium diffusion in skeletal muscle (1). The diffusion-reaction model of a cylindrical half sarcomere is divided in a mesh with 50 longitudinal and 20 radial compartments with an assumed total length  $L=1.25 \mu\text{m}$  and radius  $R=0.5 \mu\text{m}$ . Calcium diffusion coefficient is taken to be  $D=300 \mu\text{m}^2/\text{s}$  (2). Indexing the radial compartments with the variable  $i$  and the longitudinal ones with the variable  $j$  the equation for the radial and longitudinal diffusion between compartments becomes (3, Chap. 8):

$$\frac{\partial[\text{Ca}^{2+}]_{i,j}}{\partial t} = 4D(n/R)^2[[\text{Ca}^{2+}]_{1,j} - [\text{Ca}^{2+}]_{0,j}] + D\left(\frac{m}{L}\right)^2 [[\text{Ca}^{2+}]_{i,j+1} - 2[\text{Ca}^{2+}]_{i,j} + [\text{Ca}^{2+}]_{i,j-1}] + F([\text{Ca}^{2+}]_{i,j}, t)$$

For the  $m$  inner radial compartments ( $i = 0$ ) and:

$$\frac{\partial[\text{Ca}^{2+}]_{i,j}}{\partial t} = \frac{D(n/R)^2}{2i} [(2i + 1)[\text{Ca}^{2+}]_{i+1,j} - 4i[\text{Ca}^{2+}]_{i,j} + (2i - 1)[\text{Ca}^{2+}]_{i-1,j}] + D(m/L)^2 [[\text{Ca}^{2+}]_{i,j+1} - 2[\text{Ca}^{2+}]_{i,j} + [\text{Ca}^{2+}]_{i,j-1}] + F([\text{Ca}^{2+}]_{i,j}, t)$$

for all other compartments ( $i \neq 0$ ) up to  $i = n - 1$ . The radial index for the compartments representative of the sarcoplasmic reticulum being  $n$ .

$F([\text{Ca}^{2+}]_{i,j}, t)$  represents the sources and/or sinks factor for parvalbumin (PV), troponin C (TnC), calsequestrin (CASQ), mitochondrial buffers and extracellular buffers as well as the fluxes. All numerical values of the parameters are reported in the supplementary material Table 1. Buffers are modeled as

$$\frac{d[\text{SCa}^{2+}]}{dt} = k_{on}[\text{Ca}^{2+}]^n[S] - k_{off}[\text{SCa}^{2+}]$$

Where  $[S]$  is the free buffer concentration,  $[\text{SCa}^{2+}]$  the bound buffer concentration, with  $[S^{Tot}] = [S] + [\text{SCa}^{2+}]$  and  $n$  simulates the cooperativity, equal to 1 if not present.

TnC, with two calcium binding sites ( $Tr_1$  and  $Tr_2$ ) with different affinities, is described by:

$$\frac{d[Tr_1Ca^{2+}]}{dt} = k_{Tr1on}[Ca^{2+}]^{n1}[Tr] - k_{Tr1off}[Tr_1Ca^{2+}] - k_{Tr2on}[Ca^{2+}]^{n2}[Tr_1Ca^{2+}] + k_{Tr2off}[Tr_2Ca^{2+}]$$

and:

$$\frac{d[Tr_2Ca^{2+}]}{dt} = k_{Tr2on}[Ca^{2+}]^{n2}[Tr_1Ca^{2+}] - k_{Tr2off}[Tr_2Ca^{2+}]$$

With the constraint  $[Tr^{Tot}] = [Tr] + [Tr_1Ca^{2+}] + [Tr_2Ca^{2+}]$ .

The other components of  $F([Ca^{2+}]_{l,j}, t)$  are calcium fluxes from and to the elements and compartments, through channels and pumps.

RyR channel has a constant leak computed as described in the text.

The reuptake of calcium in the SR is operated by the SERCA, here simulated in a saturable first-order kinetics (4):

$$\left. \frac{dCa^{2+}}{dt} \right|_{Up} = V_{max} \frac{[Ca^{2+}]_x}{[Ca^{2+}]_x + K_m}$$

active in each compartment x which is in the  $i=n-1$  radial position. A similar kinetics is imposed to the MCU flux or  $v_{MCU}$

$$v_{MCU} = \left. \frac{dCa^{2+}}{dt} \right|_{MCU} = V_{MCU} \frac{[Ca^{2+}]_c^h}{[Ca^{2+}]_c^h + K_d^h}$$

Notably, the  $[Ca^{2+}]_{cyto}$  sensed by the MCU is in the element  $i=n-2, j=m_{RyR}-2$ , being  $m_{RyR}$  the longitudinal index of the compartment which contains the RyR, roughly equating to the average distances inferred from the structural data (see text). The efflux of calcium from the mitochondria via the Sodium-Calcium-Lithium Exchanger (NCLX) follows the model proposed by Dash and Beard (5) with a 3:1 stoichiometry for  $Na^+$  and  $Ca^{2+}$



$$\left. \frac{dCa^{2+}}{dt} \right|_{NCLX} = V_{NCLX} \left( \frac{e^{+\frac{0.5\Delta\Psi_m F}{RT}} \frac{[Na^+]_c^3 [Ca^{2+}]_m}{K_{Na}^3 K_{Ca}} - e^{-\frac{0.5\Delta\Psi_m F}{RT}} \frac{[Na^+]_m^3 [Ca^{2+}]_c}{K_{Na}^3 K_{Ca}}}{1 + \frac{[Na^+]_c^3}{K_{Na}^3} + \frac{[Ca^{2+}]_m}{K_{Ca}} + \frac{[Na^+]_c^3 [Ca^{2+}]_m}{K_{Na}^3 K_{Ca}} + \frac{[Na^+]_m^3}{K_{Na}^3} + \frac{[Ca^{2+}]_c}{K_{Ca}} + \frac{[Na^+]_m^3 [Ca^{2+}]_c}{K_{Na}^3 K_{Ca}}} \right)$$

In our simplified approach, the values of  $[Na^+]_c$ ,  $[Na^+]_m$ , and  $\Delta\Psi_m$ , are assumed to be constant during the train of stimuli. A similar equation is used to simulate the Sodium-Calcium Exchanger (NCX) flux, as proposed in (6). MCU and NCLX have a constant flux of  $Ca^{2+}$  even in resting conditions. This would also create a local modification of the  $Ca^{2+}$  concentration, though smaller than the one generated by the RyR leakage. However, the size of the compartments is not small enough to appreciate this effect. Since the mitochondria occupy only one compartment, the two fluxes are simply balancing each other.

The influx from the extracellular compartment, operated by the SOCE, is meant to equilibrate the  $[Ca^{2+}]_{SR}$  content to keep it at the quiescent level of 500  $\mu M$  (7)

**Supplementary Table 1: Parameters definitions, values adapted at 25°C, and reference (concentration values are express with reference to 1 Liter fiber volume,  $L_{\text{fiber}}$ )**

| Parameter                      | Meaning                                       | Value                              |
|--------------------------------|-----------------------------------------------|------------------------------------|
| L                              | length of half-sarcomere                      | 1.25 $\mu\text{m}$                 |
| R                              | Radius of sarcomere                           | 0.5 $\mu\text{m}$                  |
| $V_{\text{TC}}$                | volume of Terminal Cisternae                  | 3.5% $V_{\text{tot}}$              |
| $V_{\text{SR}}$                | volume of Sarcoplasmic Reticulum              | 5.5% $V_{\text{tot}}$              |
| $V_{\text{mito}}$              | Volume of mitochondrion                       | 4.2%-5.6% $V_{\text{tot}}$         |
| $V_{\text{t-sys}}$             | Volume of T-tubule system                     | 1% $V_{\text{tot}}$                |
| D                              | free diffusion coefficient                    | 300 $\mu\text{m}^2 \text{s}^{-1}$  |
| CSQ1                           | Calsequestrin 1 concentration                 | 1200 $\mu\text{M}$                 |
| CSQ2                           | Calsequestrin 2 concentration                 | 120 $\mu\text{M}$                  |
| $k_{\text{ON}}^{\text{CS1}}$   | Calsequestrin 1 binding rate                  | 3 $10^{-3} \mu\text{M s}^{-1}$     |
| $k_{\text{OFF}}^{\text{CS1}}$  | Calsequestrin 1 unbinding rate                | 3 $\text{s}^{-1}$                  |
| $n^{\text{CS1}}$               | Calsequestrin 1 cooperativity                 | 3                                  |
| $k_{\text{ON}}^{\text{CS2}}$   | Calsequestrin 2 binding rate                  | 15 $10^{-4} \mu\text{M s}^{-1}$    |
| $k_{\text{OFF}}^{\text{CS2}}$  | Calsequestrin 2 unbinding rate                | 15 $10^{-4} \mu\text{M s}^{-1}$    |
| $n^{\text{CS2}}$               | Calsequestrin 2 cooperativity                 | 1                                  |
| PV                             | Parvalbumin concentration                     | 1500 $\mu\text{M}$                 |
| $k_{\text{ON}}^{\text{PaCa}}$  | PV-Ca binding rate                            | 77.8 $\mu\text{M s}^{-1}$          |
| $k_{\text{OFF}}^{\text{PaCa}}$ | PV-Ca unbinding rate                          | 1.7 $\text{s}^{-1}$                |
| Tr                             | Troponin concentration                        | 240 $\mu\text{M}$                  |
| $k_{\text{ON}}^{\text{Tr1}}$   | Troponin 1 binding rate                       | 707 $\mu\text{M s}^{-1}$           |
| $k_{\text{OFF}}^{\text{Tr1}}$  | Troponin 1 unbinding rate                     | 2885 $\text{s}^{-1}$               |
| $k_{\text{ON}}^{\text{Tr2}}$   | Troponin 2 binding rate                       | 162.6 $10^{-4} \mu\text{M s}^{-1}$ |
| $k_{\text{OFF}}^{\text{Tr2}}$  | Troponin 2 unbinding rate                     | 31.1 $\text{s}^{-1}$               |
| $B_{\text{tsys}}$              | T-system buffer                               | 400 $\mu\text{M}$                  |
| T                              | Absolute temperature                          | 300 K                              |
| $X_{\text{NCE}}$               | NCLX factor                                   | see text                           |
| $\Delta\Psi$                   | Mitochondrial inner membrane potential        | 190 mV                             |
| $K_{\text{Ca}}^{\text{NCE}}$   | $\text{Ca}^{2+}$ binding constant of NCLX     | 2.1 $\mu\text{M}$                  |
| $K_{\text{Na}}^{\text{NCE}}$   | $\text{Na}^{+}$ binding constant of NCLX      | 8200 $\mu\text{M}$                 |
| $V_{\text{MCU}}$               | MCU maximum flux rate                         | 22.4 $\mu\text{M s}^{-1}$          |
| h                              | Hill parameter for MCU                        | 2                                  |
| $K_{\text{d}}$                 | MCU binding constant for $[\text{Ca}^{2+}]$   | 20 $\mu\text{M}$                   |
| $V_{\text{max}}$               | maximum pump rate for SERCA                   | 5.6 $\cdot 10^3 \mu\text{M}$       |
| $K_{\text{m}}$                 | SERCA binding constant for $[\text{Ca}^{2+}]$ | 0.5 $\mu\text{M}$                  |

## References:

1. Marcucci, L., M. Canato, F. Protasi, G.J.M. Stienen, and C. Reggiani. 2018. A 3D diffusional-compartmental model of the calcium dynamics in cytosol, sarcoplasmic reticulum and mitochondria of murine skeletal muscle fibers. *PLOS ONE*. 13:e0201050.
2. Cannell, M.B., and D.G. Allen. 1984. Model of calcium movements during activation in the sarcomere of frog skeletal muscle. *Biophysical Journal*. 45:913–925.
3. Crank, J. 1979. *The Mathematics of Diffusion*. Clarendon Press.
4. Westerblad, H., and D.G. Allen. 1994. The role of sarcoplasmic reticulum in relaxation of mouse muscle; effects of 2, 5-di (tert-butyl)-1, 4-benzohydroquinone. *The Journal of Physiology*. 474:291.
5. Dash, R.K., and D.A. Beard. 2008. Analysis of cardiac mitochondrial Na<sup>+</sup>-Ca<sup>2+</sup> exchanger kinetics with a biophysical model of mitochondrial Ca<sup>2+</sup> handling suggests a 3: 1 stoichiometry: Characterization of mitochondrial NCE stoichiometry. *The Journal of Physiology*. 586:3267–3285.
6. Rincón, O.A., A.F. Milán, J.C. Calderón, and M.A. Giraldo. 2021. Comprehensive Simulation of Ca<sup>2+</sup> Transients in the Continuum of Mouse Skeletal Muscle Fiber Types. *International Journal of Molecular Sciences*. 22:12378.
7. Scorzeto, M., M. Giacomello, L. Toniolo, M. Canato, B. Blaauw, C. Paolini, F. Protasi, C. Reggiani, and G.J.M. Stienen. 2013. Mitochondrial Ca<sup>2+</sup>-Handling in Fast Skeletal Muscle Fibers from Wild Type and Calsequestrin-Null Mice. *PLoS ONE*. 8:e74919.
